# Supplementary material for: Essential Oils from Six Aromatic Plants of Langtang National Park: Insights on Their Chemical Constituents via GC-MS Analysis
Source: MDPI journal article supplement (doi:10.3390/separations10010052), 2023-01-13
Supplement: s1 [file s1]

# **Essential Oil from Six Aromatic Plants of Langtang National Park: Insights on their Chemical Constituents via GCMS Analysis**

**Samjhana Pradhan <sup>1\*</sup>, Hem Raj Paudel <sup>2</sup>, Romi Maharjan <sup>1</sup> and Kavita Sharma<sup>3</sup>**

**<sup>1</sup> Department of Plant Resources, Thapathali, Kathmandu, Nepal.**

**<sup>2</sup> National Herbarium and Plant Laboratories (KATH), Godavari, Lalitpur, Nepal.**

**<sup>3</sup>Department of Biomedical and Pharmaceutical Sciences, Idaho State University, Pocatello, ID 83209, USA.**

**\*Email: samjhanapradhan313@gmail.com**

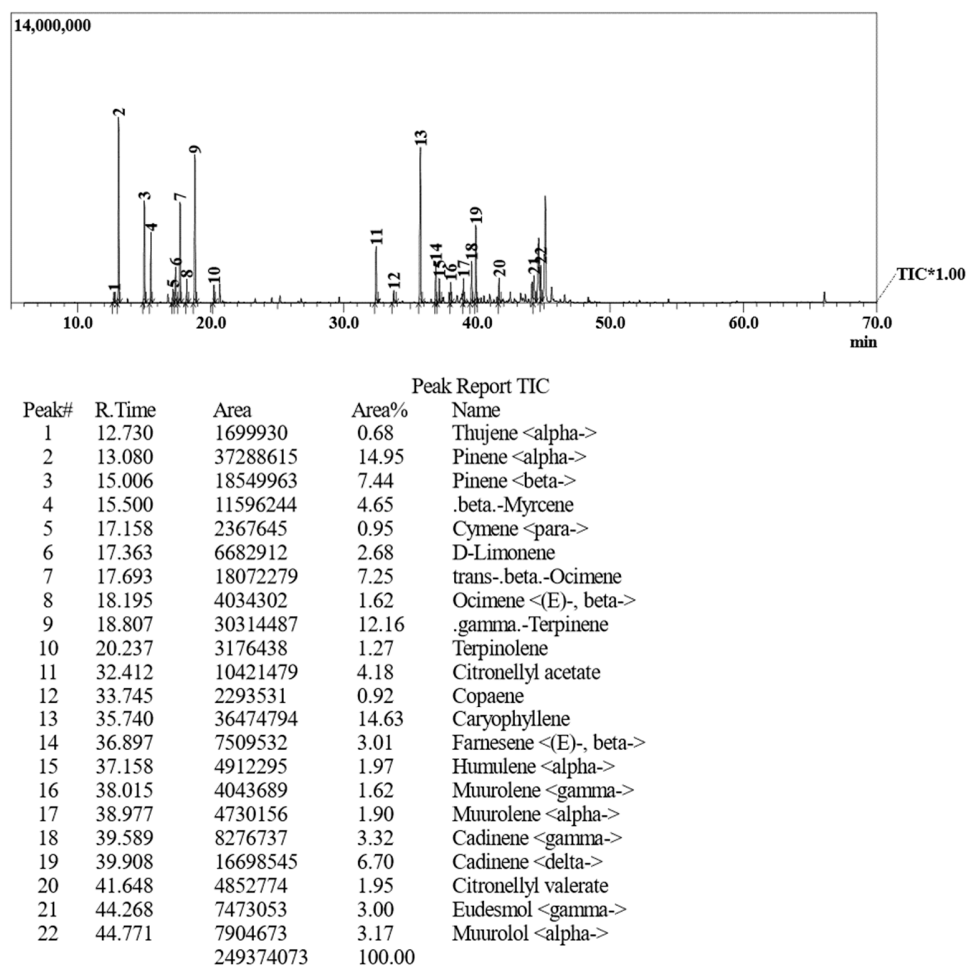

**Figure S1.** Total ion chromatogram (TIC) and peak table of essential oil from *Rhododendron anthopogon* (AN)

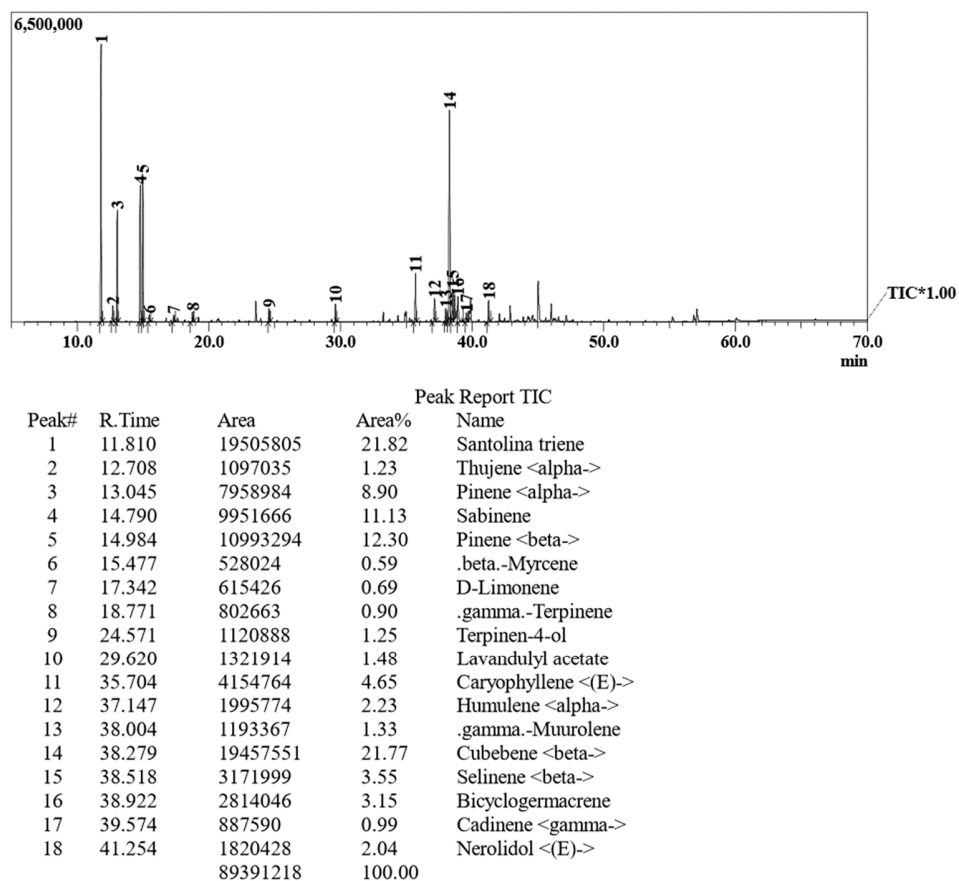

**Figure S2.** Total ion chromatogram (TIC) and peak table of essential oil from *Artemisia dubia* (AR)

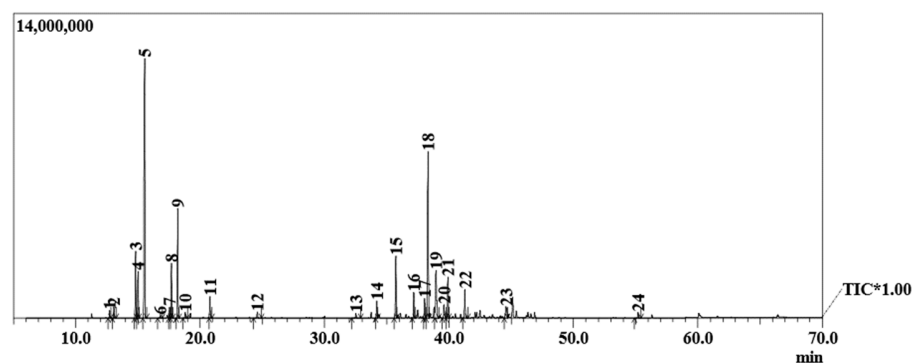

| Peak# | R.Time | Area      | Area%  | Name                  |
|-------|--------|-----------|--------|-----------------------|
| 1     | 12.730 | 1155751   | 0.54   | Thujene <alpha->      |
| 2     | 13.068 | 1729987   | 0.81   | Pinene <alpha->       |
| 3     | 14.814 | 10740517  | 5.02   | Sabinene              |
| 4     | 15.008 | 7624822   | 3.56   | Pinene <beta->        |
| 5     | 15.542 | 57884456  | 27.04  | .beta.-Myrcene        |
| 6     | 16.789 | 423127    | 0.20   | Terpinene <alpha->    |
| 7     | 17.546 | 1838632   | 0.86   | Eucalyptol            |
| 8     | 17.692 | 8671058   | 4.05   | trans-.beta.-Ocimene  |
| 9     | 18.205 | 19158122  | 8.95   | Ocimene <(E)-, beta-> |
| 10    | 18.797 | 993472    | 0.46   | .gamma.-Terpinene     |
| 11    | 20.786 | 3710086   | 1.73   | Perillene             |
| 12    | 24.596 | 1250929   | 0.58   | Terpinen-4-ol         |
| 13    | 32.513 | 912178    | 0.43   | Cubebene <alpha->     |
| 14    | 34.191 | 3026832   | 1.41   | (-).beta.-Bourbonene  |
| 15    | 35.727 | 12403131  | 5.79   | Caryophyllene         |
| 16    | 37.165 | 4902211   | 2.29   | Humulene <alpha->     |
| 17    | 38.035 | 3978056   | 1.86   | .gamma.-Murolene      |
| 18    | 38.315 | 39094938  | 18.26  | Cubebene <beta->      |
| 19    | 38.947 | 13216201  | 6.17   | Bicyclogermacrene     |
| 20    | 39.594 | 3324643   | 1.55   | Cadinene <gamma->     |
| 21    | 39.908 | 7740509   | 3.62   | Cadinene <delta->     |
| 22    | 41.274 | 5179489   | 2.42   | Nerolidol <(E)->      |
| 23    | 44.573 | 4160243   | 1.94   | .tau.-Cadinol         |
| 24    | 55.185 | 973801    | 0.45   | Camphorene <m->       |
|       |        | 214093191 | 100.00 |                       |

**Figure S3.** Total ion chromatogram (TIC) and peak table of essential oil from *Boenninghausenia albiflora* (BE)

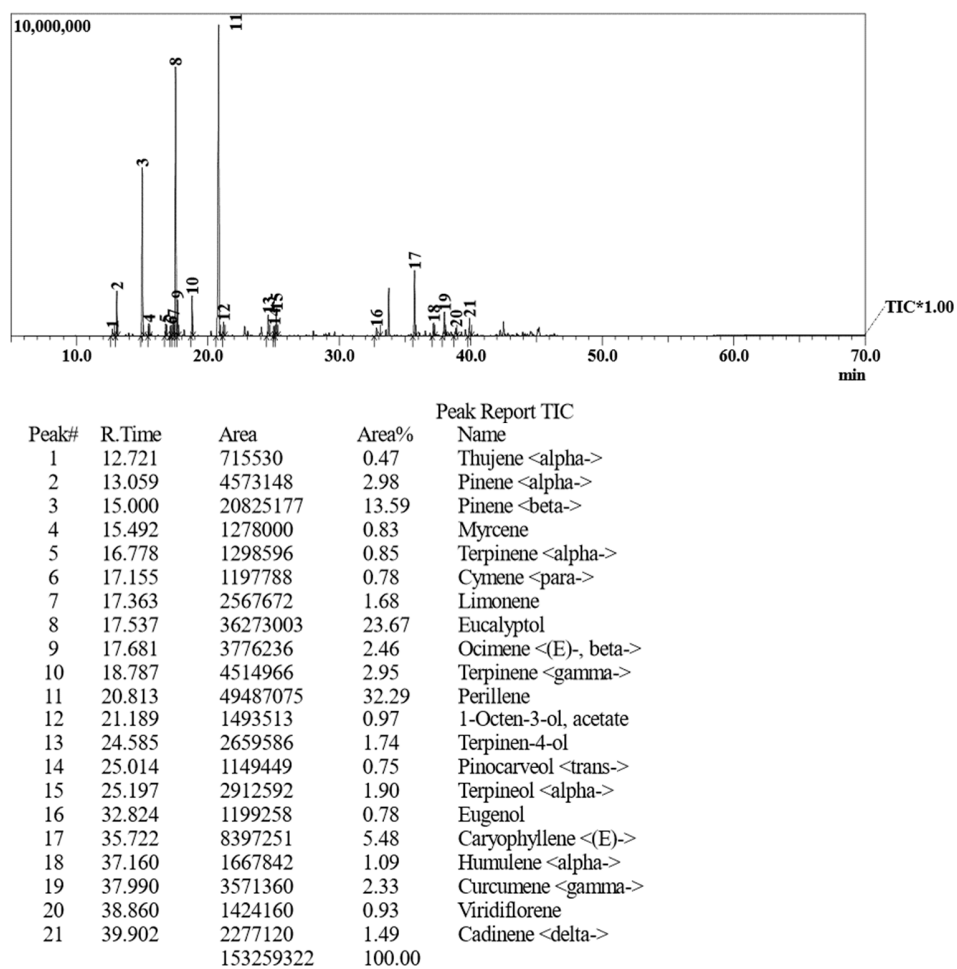

**Figure S4.** Total ion chromatogram (TIC) and peak table of essential oil from *Elsholtzia fruticosa* (EL)

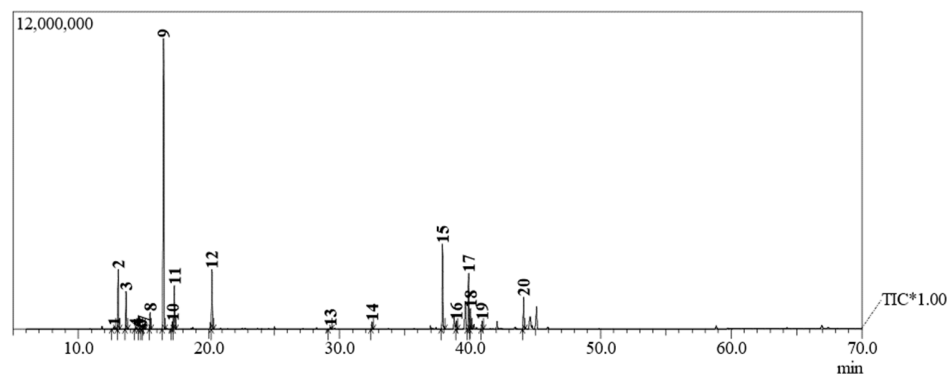

| Peak Report TIC |        |           |        |                            |
|-----------------|--------|-----------|--------|----------------------------|
| Peak#           | R.Time | Area      | Area%  | Name                       |
| 1               | 12.716 | 361852    | 0.31   | Thujene <alpha->           |
| 2               | 13.054 | 7679023   | 6.51   | Pinene <alpha->            |
| 3               | 13.648 | 4966514   | 4.21   | Fenchene <alpha->          |
| 4               | 14.378 | 268375    | 0.23   | Menthatriene <1,3,8-para-> |
| 5               | 14.682 | 162988    | 0.14   | Cymene <meta->             |
| 6               | 14.796 | 48940     | 0.04   | Sabinene                   |
| 7               | 14.991 | 618128    | 0.52   | Pinene <beta->             |
| 8               | 15.486 | 2115776   | 1.79   | Myrcene                    |
| 9               | 16.524 | 51549565  | 43.70  | Carene <delta-3->          |
| 10              | 17.197 | 1034771   | 0.88   | Sylvestrene                |
| 11              | 17.350 | 6573995   | 5.57   | Limonene                   |
| 12              | 20.225 | 8508591   | 7.21   | Terpinolene                |
| 13              | 29.290 | 351106    | 0.30   | Pregeijerene B             |
| 14              | 32.491 | 988014    | 0.84   | Cubebene <alpha->          |
| 15              | 37.893 | 13404141  | 11.36  | Cadina-1(6),4-diene        |
| 16              | 38.960 | 1287693   | 1.09   | Muurolene <alpha->         |
| 17              | 39.888 | 8888373   | 7.53   | Cadinene <delta->          |
| 18              | 40.025 | 3057497   | 2.59   | Zonarene                   |
| 19              | 40.921 | 1186551   | 1.01   | Elemol <alpha->            |
| 20              | 44.104 | 4920144   | 4.17   | Epicubenol                 |
|                 |        | 117972037 | 100.00 |                            |

**Figure S5.** Total ion chromatogram (TIC) and peak table of essential oil from leaves of *Juniperus recurva* (JL)

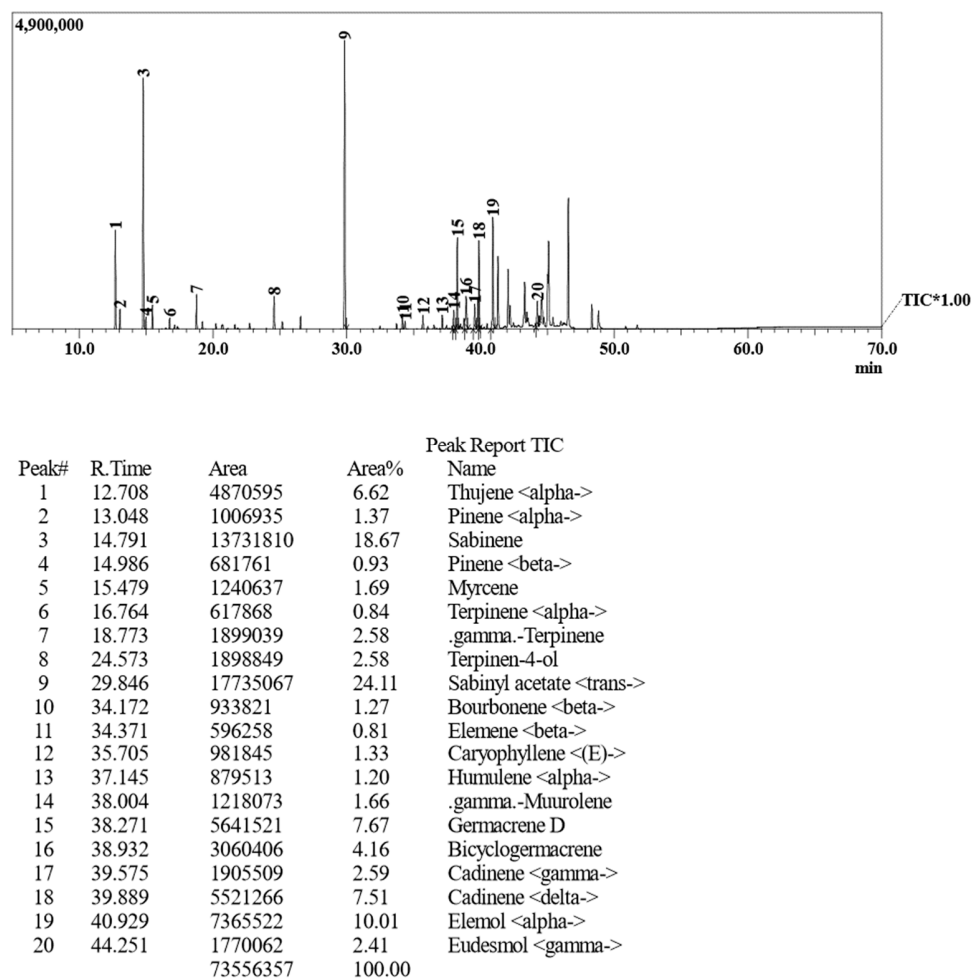

**Figure S6.** Total ion chromatogram (TIC) and peak table of essential oil from *Rhododendron setosum* (SE)
